# Supplementary material for: Toxicity Assessment of a Single Dose of Poly(ethylene glycol) Diglycidyl Ether (PEGDE) Administered Subcutaneously in Mice
Source: MDPI journal article supplement (doi:10.3390/toxics9120354), 2021-12-15
Supplement: s1 [file s1]

# PEGDE

## 20000

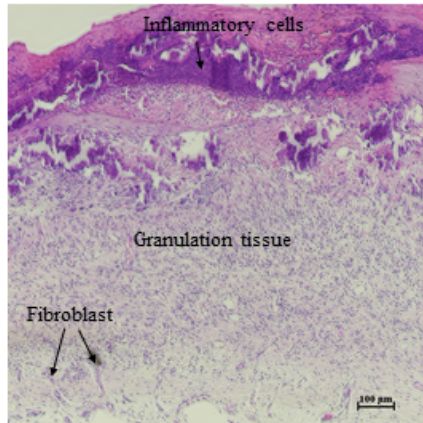

**Figure S1.** Histological analysis of mouse skin tissues. Seven-week-old BALB/c male mice were treated with 20,000 μg of PEGDE. Histology images of skin sections at 100x magnification.
